# Supplementary material
Source: PubMed Central journal article supplement (PMC9839531)
Supplement: NIHMS1851493-supplement-7.pdf [file NIHMS1851493-supplement-7.pdf]

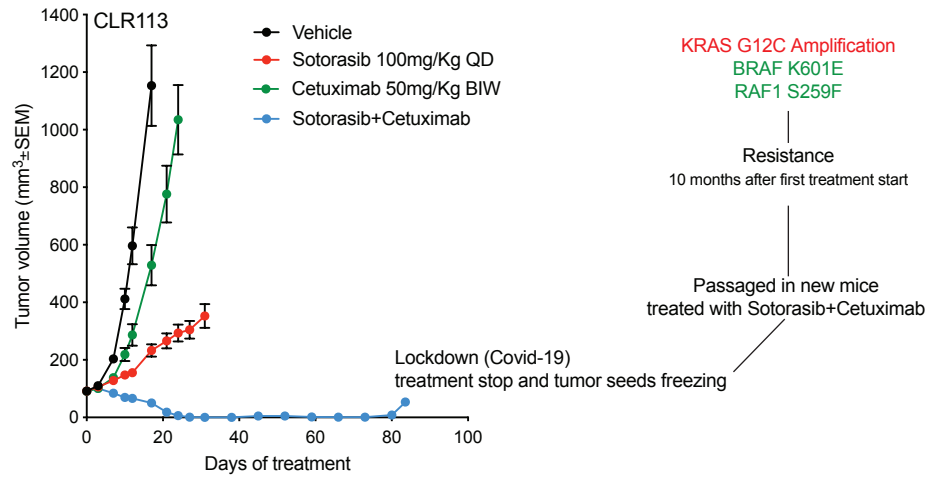

**Supplementary Figure 4:** Generation of CLR113 PDX with acquired resistance to cetuximab/sotorasib combination.
